# Supplementary material
Source: PubMed Central journal article supplement (PMC3056603)

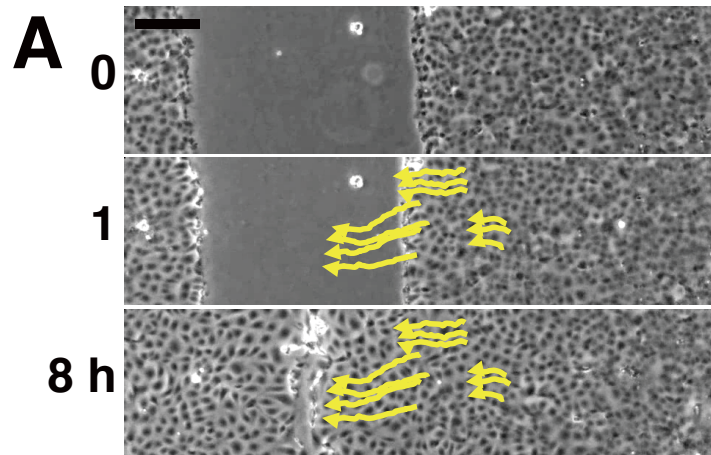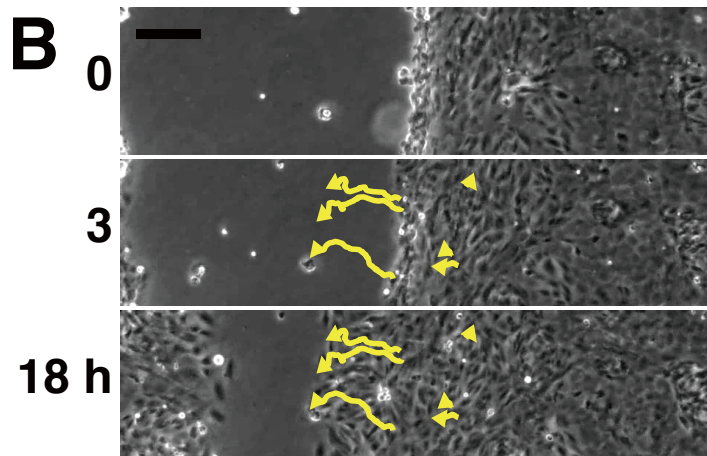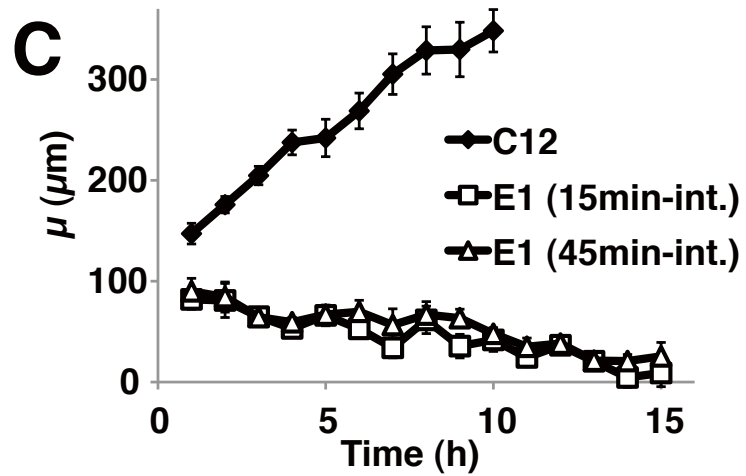

Supplement: supp_124_7_1017__1.pdf [file supp_124_7_1017__1.pdf]

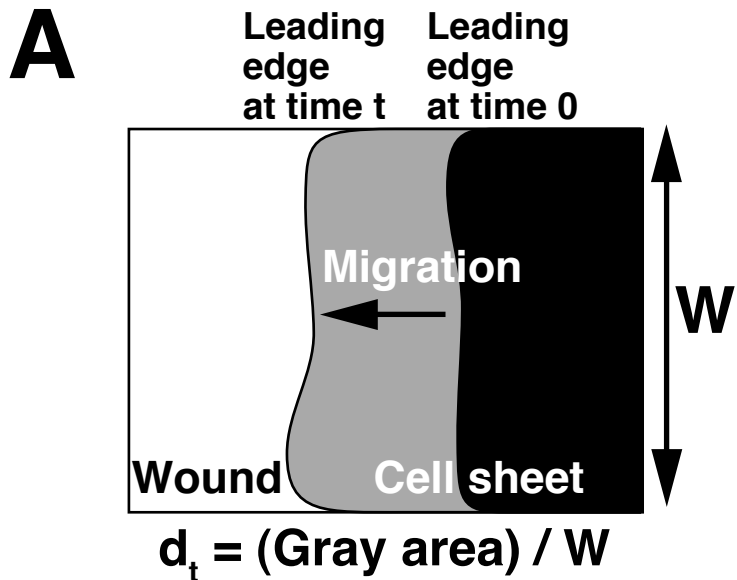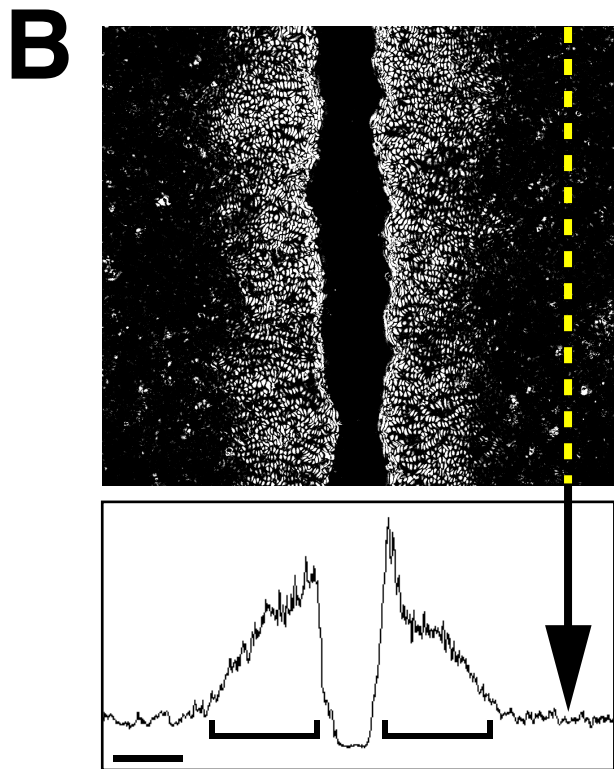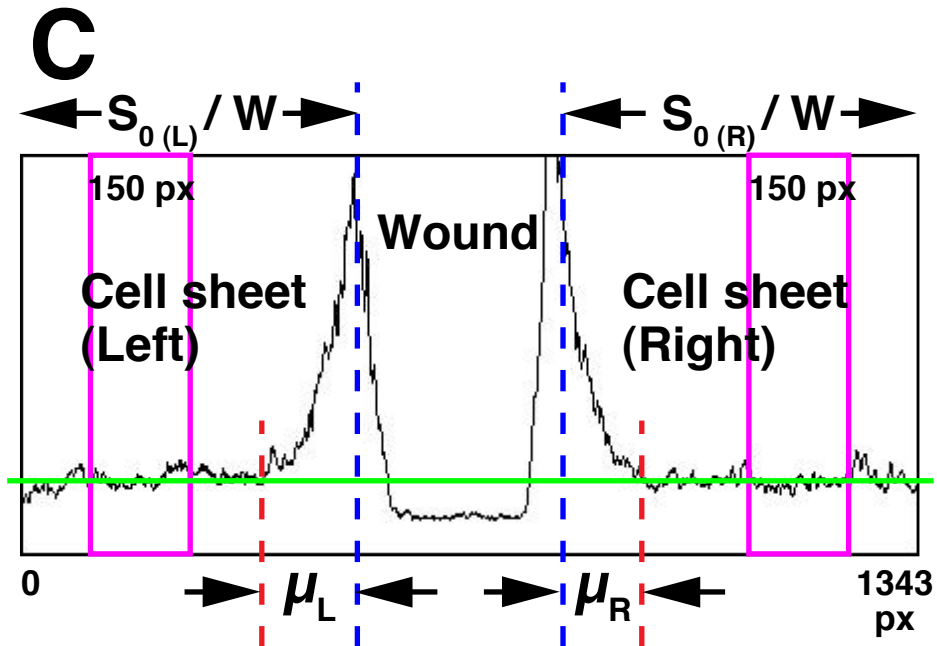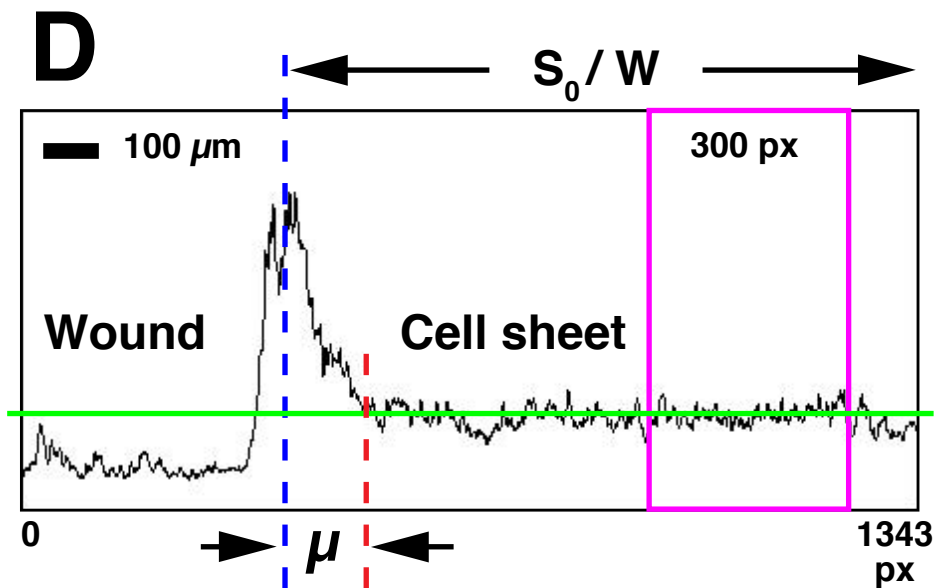

Supplement: supp_124_7_1017__2.pdf [file supp_124_7_1017__2.pdf]

**A****Hoechst/Phospho-H3**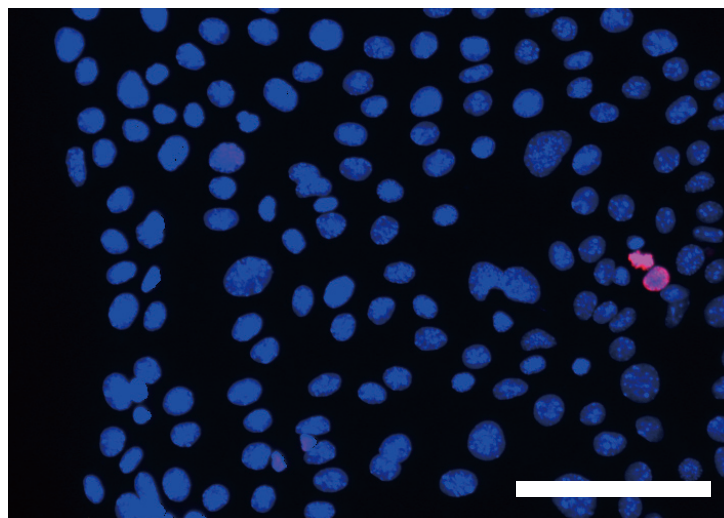

▲ Wound edge at 8 hours

**B**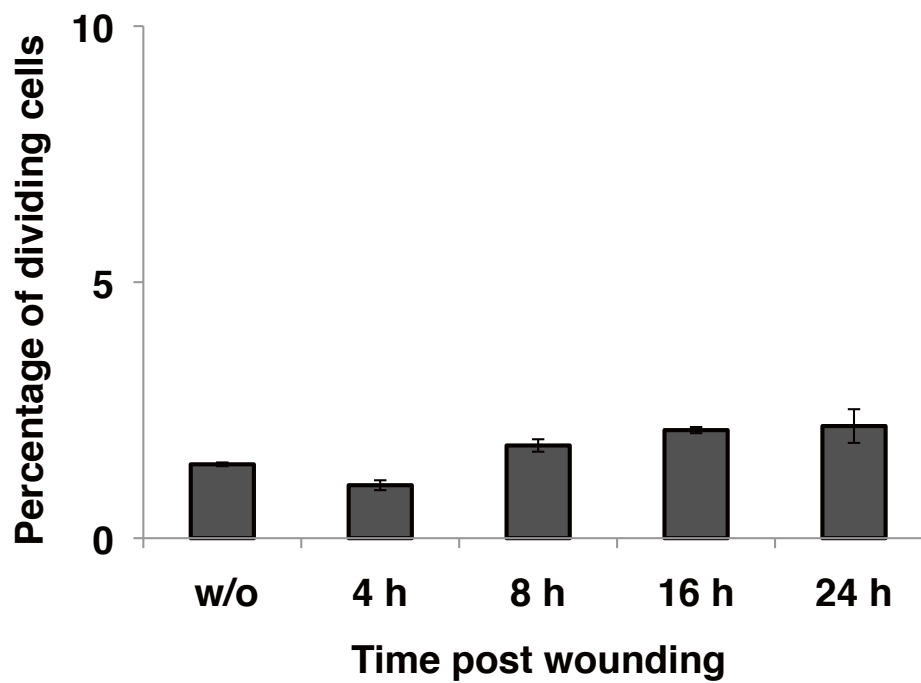

Supplement: supp_124_7_1017__3.pdf [file supp_124_7_1017__3.pdf]

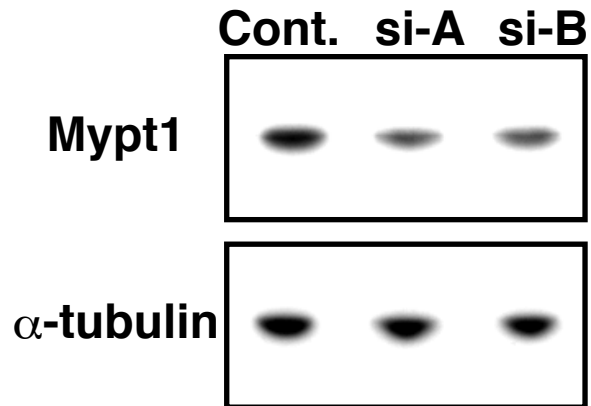

Supplement: supp_124_7_1017__4.pdf [file supp_124_7_1017__4.pdf]

**A**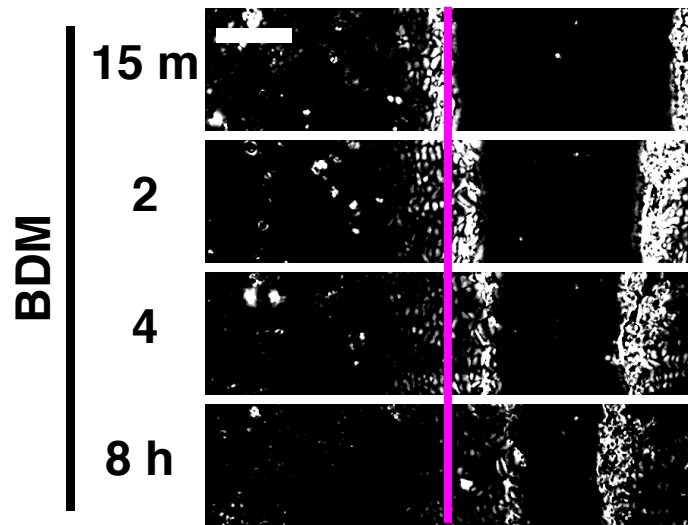**B**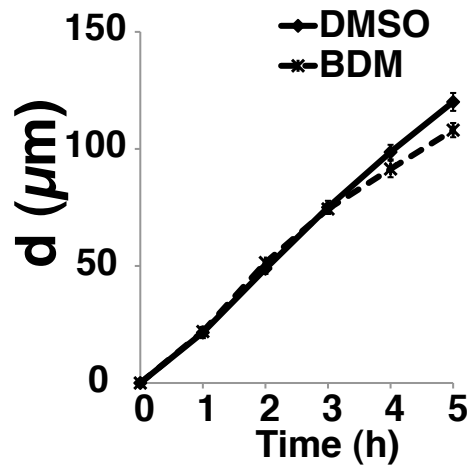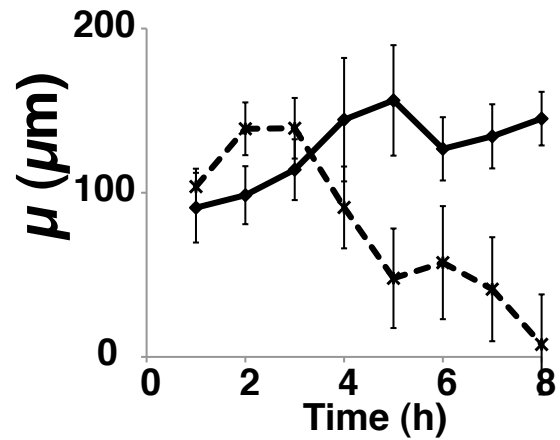

Supplement: supp_124_7_1017__5.pdf [file supp_124_7_1017__5.pdf]
